# Supplementary material for: Chromatin-Remodelling ATPases ISWI and BRM Are Essential for Reproduction in the Destructive Pest Tuta absoluta
Source: MDPI journal article supplement (doi:10.3390/ijms23063267), 2022-03-17
Supplement: s1 [file s1]

# A

1 GCTAATGTATTGGATAATTTATTGTGAATCGTAATAATATAACAGAAGATTTACAAATTAACAATATGTCAACCTGATGAAGCTATGGATGTAGGGGACGTGGAAGAAAACTCTAAT  
1 M S Q P D E A M D V G D V E E N S N  
121 GAGTCGTCCAGCATACCACGTCCTCAAGGGTAAAGAAGGAGACTTCGAAGTAAAAATGAGACCGATCGTTCAAGCGTTTTGATTTTTGTTGAAACAACTGAAATATTCTCGCAT  
19 E S S S D T T S S K G K E G D F E S K I E T D R S K R F D F L L K Q T E I F S H  
241 TTCATGACCAATGCGCTAAAACAGTAGTCTCTCAAGGCTAAAGCCGTCGACCTAAAAGGTGAAAGAAGATCTGCCTGAGCAGTCTGAGGATGCTTTCGACGACACCATCGGCAC  
59 F M T N A P K T S S P P K A K A G R P K K V K E D L P E Q S E D A S A A D H R H  
361 CGCAAGACTGAACAGGAAGAAGATGAGGAACCTCTTGCTGAGACAAACGCTAAGATTAAAGCCAATATTTCGCTTTGAAGCATCACCTCCTTACATCAAGATGGAGAAATGAGAGATTAT  
99 R K T E Q E E D E E L L A E T N A K I K P I F R F E A S P P Y I K N G E M R D Y  
481 CAAGTGAGAGGTCTCAACTGGATGATACTCTCTATGAGAATGGTATTAATGGTATCTTGGCTGATGAGATGGGTCTGGGTAAAAACATTACAAACATTCTCTTCTTGGCTACATGAAA  
139 Q V R G L N W M I S L Y E N G I N G I L A D E M G L G K T L Q T I S L L G Y M K  
601 AATTTCAGAAATATCCCTGGTCCACACATAGTAATTGTCCAAAATCAACCTTAACCAACTGGATGAATGAGTTCAAAAAATGGTGCTTCCCTTAAGAGCAGTGTGCTTATTGGAGAT  
179 N F R N I P G P H I V I V P K S T L T N W M N E F K K W C P S L R A V C L I G D  
721 CAGGAAACAAAGAACACATTACCGTGAAGTACTGATGCCTGGCACTGGGATGTGCATCACCTCTTACGAGATGATTATCCGTGAGAGATCAGTATTTAAGAAGTTCACCTTGGCGC  
219 Q E T R N T F I R E V L M P G N W D V C I T S Y E M I I R E R S V F K K F T W R  
841 TACATGGTGATTGACGAAGCCCATCGAATCAAGAATGAGAAGTCAAAGTGTGCAGAGCTTCTCCGGGAGTTCAAGAGTATGAACCGGCTGCTGCTACTGGCACACCGTTCGAAAACAA  
259 Y M V I D E A H R I K N E K S L S E L L R E F K S M N R L L T G T P L T Q N N  
961 CTTACGAGCTGTGGGCACTTCTTAACCTTCTTGTACCAGATGATTCAACAGCTCTGATGATTTTGACTCTTGGTTCAACACCAATGCAGCTCTCGTGATAATCAGCTGGTGTCCCGG  
299 L H E L W T A A L L N F L L P D V F N S S D D F D S W F N T N A A L G D N Q L V S R  
1081 TTGCATGCTGTGTGAGACCGTCTTACTCAGACGCTCTCAATCTGAAGTAGAAAAGAAATGAAACCCAAAAGGAACCTCAAAGTTTATGTTGGATTGAGTAAGTGCAAGGGGAGTGG  
339 L H A V L R P F L L R R L K S E V E K K L K P K K E L K V Y V G L S K M Q R E W  
1201 TATACTAAAGTACTCATGAAGGATATTGATATTGTAACCGCGCGGGCAAAGTCAAAAAGATGCGTCTCCAGAACATCCTGATGCAGCTCGCAAGTCTGCAACCCCGGTACCTGTTT  
379 Y T K V L M K D I D I V N G A G V E K M R L Q N I L M Q L R K K C C N H P Y L F  
1321 GACGGCGCGGAGCCCGCCGCCCTACACACGACGAGCATCTCGTCTACAACCTGCGGAAACTCGGCATCTCGACAAAATGCTGCCAAGCTGCAGCAGCAGGACTCCAGGGTGCTC  
419 D G A E P G P P Y T T D E H L V Y N C G K L A I L D K L L P K L Q Q Q D S R V L  
1441 ATCTTCTCGCAGATGACCAGGATGCTGGATATTCTGGAGGATTATGCTGTGGAGGACAGTAAAGTACTGCGCTTAGACGGTCAGACCCACATGAAGACCGCAACCGCAGATCGAG  
459 I F S R T R M L D I L E D Y C L W R Q Y K Y C R L D G Q T P H E D R N R Q I E  
1561 GAGTATAACGGGAAGGCTCCGAGAAGTTCGTGTTATGTTGCCACCGCGCGGGCTGGGATCAACCTCACCTCGGCAGATGTCGTATCATATACGACTCCGACTGGAACCCG  
499 E Y N A E G S E K F V F M L S T R A G G L G I N L T S A D V V I I Y D S D W N P  
1681 CAGATGGACCTGCAGGCGATGGACGCGCGCATCGTATTGGGACAGATGAAACAAGTGCCTGATTTCAGACTGATCACGGAGAACACGGTGGAAGAGAAGATAGTGGAGCGCGGGAAGTG  
539 Q M D L Q A M D R A H R I G Q M K Q V R V F R L I T E N T V E E K I V E R A E V  
1801 AAATACGCTAGACAAGCTCGTAATCCAGTCCGGCGCGCTCGTGACCAGAAGAACAGCTCAACAAGGACGAAATGCTCAACATGATCAGGCAGCGGGCAACCAACGCTCTCTCTCG  
579 K L R L D M K L V I Q S G R L V D Q K N Q L N K D E M L N M I R H G A N H S S  
1921 AAGGACTCCGAGATCACCGATGAGGATATTGACTCTATTCTAGCCAAAGGAGAGACCAAGACAGAGAATTGAAACAGAAGTTGGAGAGCCTGGAGGAGTCACTCTCTGAGAGCTTCTCG  
619 K D S E I T D E D I D S I L A K G E T K T E E L K Q K L E S L E E S S L R A F S  
2041 ATGGACACCCCGCGGACCGACTCCGTCTACCAATTGCAAGGCGAGGACTACCGGGAGAAGCAGAAGTGCACCCGCTGGCGAGCTGGATCGAGCCCGCAAGCGCGAGCGCAAGGCC  
659 M D T P G A T D S V Y Q F E G E D Y R E K Q K S H P L G S W I E P P K R E R K A  
2161 AACTACGCGGTGGACGCTACTTCCGCGAGGCGCTGCGCTCTCCGAGCCCAAGGCGCGAAAGTGCAGGCGCGCGCCCCCAAGCAGCCCATCGTCAGGACTTCCAGTTCTTCCG  
699 N Y A V D A Y F R E A L R V S E P K A P K V Q A P R P P K Q P I V Q D F Q F F P  
2281 CCGAGGCTGTTCCGAGCTGCTGGACAGGAGATCTACCCTACAGAAAAGCATTGGGGTACAAAAGTGGCGGTAACCCGGAGCTGGGCCCCGACGCGCCAAGATACAGAGAGAGGAGCAG  
739 P R L F E L L D Q E I Y H Y R K T L G Y K V P R N P E L G P D A A K I Q R E E Q  
2401 AGGAAGATCGACGACGCCGAAGCGCTCACCAGGAGGAGGTTGCTGAGAAGAAAACCTTCTACTCAGGGTTTCACAACTGGACAAAACGCGACTTCAACCACTCATCAAAGCTAAT  
779 R K I D D A E A L T E E E V A E K E N L L T Q G F T N W T K R D F N Q F I K A N  
2521 GAGAAGTATGGAAGGATGACATCGAAAATATTGCAAAAAGATGTCGAAGGAAAAACCCCGAAGAGGTGATGGAATACTCGGCAGTGTCTGGGAGCGCTGCCACGAGCTCGAGGACGTG  
819 E K Y G R D D I E N I A K D V E G K T P E E V M E Y S A V F W E R C H E L Q D V  
2641 GACCGGATCATGGGCAGATCGAGCGCGGCGAGGCCAAGATACAGGCGCGCGCTCCATCAAGAAGGCGCTCGACGCCAAGATGGCGGCTACCGGGCGCCCTTCCACCAGCTCAGGATA  
859 D R I M G Q I E R G E A K I Q R R A S I K K A L D A K M A R Y R A P F H Q L R I  
2761 TCCTACGGGACTAACAAGGGGAAGAATAATGTCGAAGAAGAAGACAGGTTCTGGTGTGCATGCTGCACAAGCTGGGCTTCGACAAGGAGAAGCTGTACGAGGAGCTGCGCGCGCGGTG  
899 S Y G T N K G K N Y V E E E D R F L V C M L H K L G F D K E N V Y E E L R A A V  
2881 CACGCGCGCGCGAGTCCGCTTCACTGCTTCTCAAGTCGCGCACGGCGGTGGAGCTGCAGCGCAGATGCAACACATTGATCACACTATCGAAAGAGAGAACCAAGAGCTCGAAGAG  
939 H A A P Q F R F D W F L K S R T A V E L Q R R C N T L I T L I E R E N Q E L E E  
3001 AAGGAGCGCGCGGAGAGAAAAAGAGAGCGGACGCGCAACCAAGACACGCGCGCGCGCAGCAAGGGCGCGCGCGCGCAAGCGCAAGGCAAGCGCGCAGGACTCCGCGCAG  
979 K E R A A E K K K K S G S A N Q N T P G A A S K G A G A G K R K A D A A Q D S A Q  
3121 AAACAGAGAAGAAGAAGAAATGAAACCCCGCGTCCGGCGACTGCAGCCCGCGCTGGCGCGCCACCAAGGCGCTCCGCGCGCAGTGACGCGCGCACTACCATCAGCTTACAT  
1019 K Q K K K K K  
3241 ACGAGGCTGACAGCGGATTTTTGATTATTTCCAAAATAAAAGTTCCACATCTTAACAGCATATAAATTCGTCCTGTCTTTTTTATCTCTCAGAACC GCCCGTGCCAGAGCGAGAAGGC  
3361 GTACTCGGCTGAAGTGTGAGCGATCCCACTCCCTTGCTGAACCATATGGCGGTTATGAGCGGTAGA

## B

```

1      AACCATCACGCTAACCCGAGCGCGAGCAGAAGAAGGAACAGGAGCGTATCGAGAAGGAACGTATGCGCCGCTGATGCGCGAGGACGAGGAGGGTTACCGGAAGCTCATCGACCAGAAG
1      M R R L M A E D E E G Y R K L I D Q K
121    AAGGACAAGCGGCTGGCGTTCTCTGTTGTCGACAGCGGACGAGTACATCGCCAGCCTCACCGAGATGGTGAAGCAGCACAAACAGGAGCAGCGCAAGAAACAAGTCGAGGAGGAGAAACGG
20     K D K R L A F L L S Q T D E Y I A S L T E M V K Q H K Q E Q R K K Q V E E E K R
241    AAGCGAAATCCCGAAGAAGAAGTTGCTGGAGGGCGGGAGATCGACGCGATGGACGACAGCTCGCAGACCTCCGACTCGCGTGTACCGTTCATGGACCCCAAGACGGCGGAAGTGTG
60     K R K S R K K K L L E G G E I D A M D D S S Q T S D S R V T V M D P K T G E V L
361    AAGGGCGAGGAAGCCCGCTGCTGCTCAGCTGAAGGGCTGGATGGAGCAGCACCCCGCTGGGAGGTGGTGTGGACTCCGACGACTCGGGGACGACAGCCAGGACGACGCGACAC
100    K G E E A P L L S Q L K G W M E Q H P G W E V V S D S D D S G D D S Q D D D G H
481    TACAAGAGACACAAACACAGGACGACAAGAATGAGAACAGGAGAAAGACCGAGGAGAGAGCGCGCGAGATGATCAAGAAAGCAAGGTGGAGGACGACGAGTACAAGACAGAGGAG
140    Y K R H K H R D D K N E N R E K T E E E K A R E M I K K A K V E D D E Y K T E E
601    CAGACATACTACGACATTGCTCATACGGTCCACGAATCCGTCACAGAACAAGCCAGCATTTTGGTCAACGAAAACCTCAAGGAATACAGATCAAGGGTCTGGAATGGCTGGTGTCTTTG
180    Q T Y Y S I A H T V H E S V T E Q A S I L V N G K L K E Y Q I K G L E W L V S L
721    TTCAACAACAACCTGAACGGTATCCTGCGGACGAGATGGGTCTCGGCAAGACCATCCAGACGATAGCGTGGTACATACCTCATGGAGAAGAAGAACTCAACGGACCATTCCTCATC
220    F N N N L N G I L A D E M G L G K T I Q T I A L V T Y L M E K K K V N G P F L I
841    ATTGTACCGCTCAGTACGCTATCAAACCTGGGTGCTGGAGTTCGAGAAGTGGCGCCGACCGTGTGCTAGTGTCTGTAACAGGCTCGCCGCGCTCGCGCCGCTCGTGCAGAACAGATG
260    I V P L S T L S N W V L E F E K W A P T V C V V S Y K G S P A S R R L V Q N Q M
961    AGGTCCACCAAGTTCAACGTGCTGCTCACCCTACGAGTACGTATCAAGGACAAGGAGTGTCTGCTAAGTGAATGGAAGTACATGATAATCGACAGGGCCACCGCATGAAGAAC
300    R S T K F N V L L T T Y E Y V I K D K G V L A K V Q W K Y M I I D E G H R M K N
1081   CACCACGTCAAGCTGACGACGCTGCTGAACACGCACTACATAGCGCGCACCGCTGCTGCTGACCGGCACGCGCTGCAGAACAGCTGCCCAAGCTGCGCGCTGCTGCACTTCCTC
340    H H C K L T Q V L N T H Y I A P H R L L L T G T P L Q N K L P E L W A L L N F L
1201   CTGCGCTCATATTCAAGAGTTGCTCCACCTTCGAACAGTGGTTCAATGCGCCCTTCGCTACCACTGGAGAAAAGGTGGAACCTAACGAGGAAGAAAGCATCTGATCATCGTGTCTA
380    L P S I F K S C S T F E Q W F N A P T T G E K V E L N E E E T I L I I R R L
1321   CACAAGTGTGCGTCCGTTCTTACTGCGGCGCTGAAGAAGGAAGTAGAGGCCAGTCCCGGACAAAAGTGGAGTACATCATCAAGTGCACATGAGCGGGTGCAGCGAGTGTCTAC
420    H K V L R P F L L R R L K K E V E S Q L P D K V E Y I I K C D M S G L Q R V L Y
1441   AAACACATGCAGTCGAAGGCGGTGCTGCTGACGGACGGCTCGGAGAAAGGACAGAAAGGCAAGGCGGGGCGAAGGCGCTCATGAACACCATCGTCGAGCTGCGCAAGCTGCAACCAT
460    K H M Q S K G V L L T D G S E K G T K G K G G A K A L M N T I V Q K R L C N H
1561   CCCTTCATGTTCCAGCACATCGAGGAGAAGTTCTGCGACCAGTCGGCTCTGGCAGCACCGTCTGTTCTGCTCCGACCTGTACCGGTGTGGGCAAGTTCGAGCTGCTGGACCGCATC
500    P F M F Q H I E E K F C D H V G S G S T V V S G P D L Y R V S G K F E L L D R I
1681   CTGCCCCAAGCTGAAGCGCACCGGCCACCGCTGCTGCTGTTCTGCGAGATGACGCGATGACCATCATCGAGGACTACCTCTCTGAGGGGGTTCACATACTTGGCGGTGGACGGT
540    L P K L K R T G H R V L V F C Q M T Q C M T I I E D Y L S W R G F Q Y L R L D G
1801   ATGACGAAGGCGGAGGACCGTGGCGAGTGTCTCAAGAAGTTCAACTGCAAGGACTCGGAATATTCTCTTCTGCTGTCTACGAGAGCTGGTGGACTTGGACTCAATCTCAGTCCGCT
580    M T K A E D R G E L L K K F N C K D S E Y F L F L L S T R A G G L G L N Q S A
1921   GACACTGTATCATCTCGATTCCGATTGGAATCCGCATCAGGATCTGCAAGCGCAAGACCGCGCATCGTATCGGACAACGTAACGAAGTGGCGGTGTGGCAGTGTACGCCATCAAC
620    D T V I I F D S D W N P H Q D L Q A Q D R A H R I G Q R N E V R V L R L M T V N
2041   TCCGTCGAGGAACGGATTCTTCCGCGCCAGGTACAATTAACATGGACGAGAAGTTATCCAAGCCGCTATGTTGATCAAAAGTCCACCGGCTCAGAGCGACAGCAGTCTCTGCAG
660    S V E E R I L A A A R Y K L N M D E K V I Q A G M F D Q K S T G S E R Q Q F L Q
2161   AGCATTCGCTCAAGACGCGCAGATGAAGAAGAAGAAATGAACCTCCGACGACGACCTCATCAACGAGATGATCGCGCGCTCGGAGGAGAGCTCGAGATCTTCAACAGATCGAC
700    S I L H Q D G D D E E E E N E L P D D L I N E M I A R S E E E L E I F K Q I D
2281   ATCGAGCGGAAGAAACGAAACCACTCCGCTCTCATAGAGGAGTGCAGCTCCCGACTACCAAGAAGCAGGACGAAGTTGTGTGCAACAGGGCCAAGGGTGGGGCAACTTC
740    I E R K K T E T T S R L I E E C E L P D W L T K N E D E V V C N K G Q G W G N F
2401   CTGGACGCTGAGGAGAGCTTCGGGCGCGGCTCCCGGACGCGCAAGAGGTTGACTACACGGACTCGCTACGGAAGAGGAGTGGCTCAAGGCCATCGACGACGAGTTCGACGACGAGGAG
780    L D A E E T F G R G S R Q R K E V D Y T D S L T E K E W L K A I D D E F D D E E
2521   GAGGAGGACGACGACGAGAGTGTCTGACAAGAAGCGCAAGAAGGGCGCAAGCGACGCGCGCAAGAAGAGTGGATGAGGAAGAAGTGGCCAGCTCATTAAGAAGAAGATAAGACG
820    E E D D D D E V L D K K R K K G R K R R R Q E E S D E E E V A S S S K K K N K T
2641   GAAGCAACCTACTGAAGAAAAGGCTCAAGAGCATTATGAAGAAAGTCGTGACTACGCTGACGAGGCGGTAGAGTCTGTGCGAGCCGTTATGAAGTGCCTGCGGCGCGAGCTG
860    E A N L L K K R L K S I M K K V V D Y A D E G G R V L S E P F M K L P S R R E L
2761   CCCGACTACTACGACGTATCAAGAAACCGCTCGATATCAAGAAAATCATGACGCGCATCGAAGACGGGAAGTACAACGACATTACGGACTTGGAGCGGATTTCTTCTACTGTGTCTAG
900    P D Y Y D V I K K P L D I K K I M T R I E D G K Y N D I T D L E R D F F T L C Q
2881   AACGCACAACCTACAACAGGAGGCGTCTCTACGCGGACTCCGTGCGACTGAGGAATGTTTTCATTGAGTTCGACGCAACTACGAGGGCGGCAACAATTCGACAACTCCGAC
940    N A Q T Y N E E A S L I Y A D S V R L R N V F I E F R R N Y E A G N N S D N S D
3001   GATGACAAAGATAAAGAAGAAGAGCTCGGACGGGAGTCGAACCGCTCGGTCAAGATGAAGATCAAGCTGAAAGGCAAGGCAAGGCGACGCCCTCGAGGAAAAAGAAAAAGAAAG
980    D D K D K E E E D S D G E S N R S V K M K I K L K G K G K G T P S R K K K Q K K
3121   TATATCTCCGACGACGAGGACTATGAGGAGGATTGAATCCGGAGTCCAACATATGTCGGGTGGAATATTGTCCAAGCCAATATTACAATAAATGAATATGCTGATTCTGAA
1020   Y I S D D E D Y E E D
3241   GTGTTAATCCACGTTTTCTGACTGGACATAATATCTCGTATCTTTTACTAAGTCAGCTTTGTGCTGTGATATACATTCTCATAGTAGTGCCAACCTACTTGTAGAGATCTGGCAAC
3361   CCTGCATCTAATCAACCAAGAGAAAAACACTTTTTTTTTATAGCTAGACAAGTAATTGCGGGAACAGGCAAGTTCTAGGATTTTAGTGAAGGGCA

```

**Figure S1.** (A) Full-length cDNA sequence of *TaISWI* and its deduced amino acid sequence. (B) Partial-length *TaBRM* cDNA sequence and its deduced aa sequence.

A

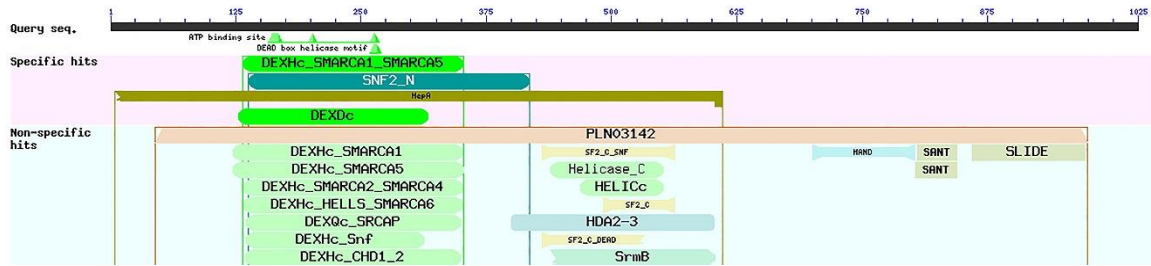

B

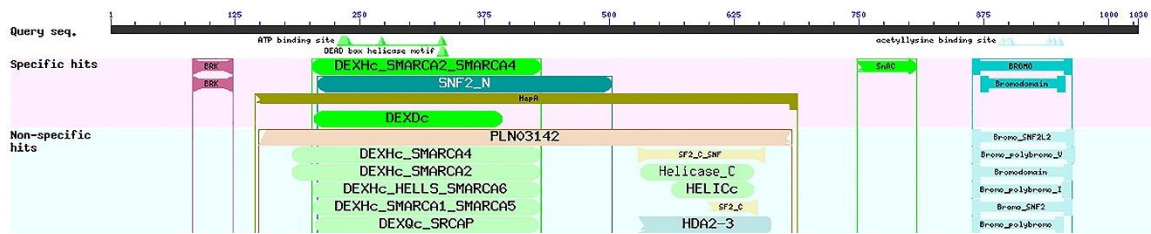

**Figure S2.** Conserved domain prediction of ISWI (A) and BRM (B) proteins in *Tuta absoluta*. The domains were analysed with the online NCBI Conserved Domains Database (<https://www.ncbi.nlm.nih.gov/Structure/cdd/wrpsb.cgi>).

**A**

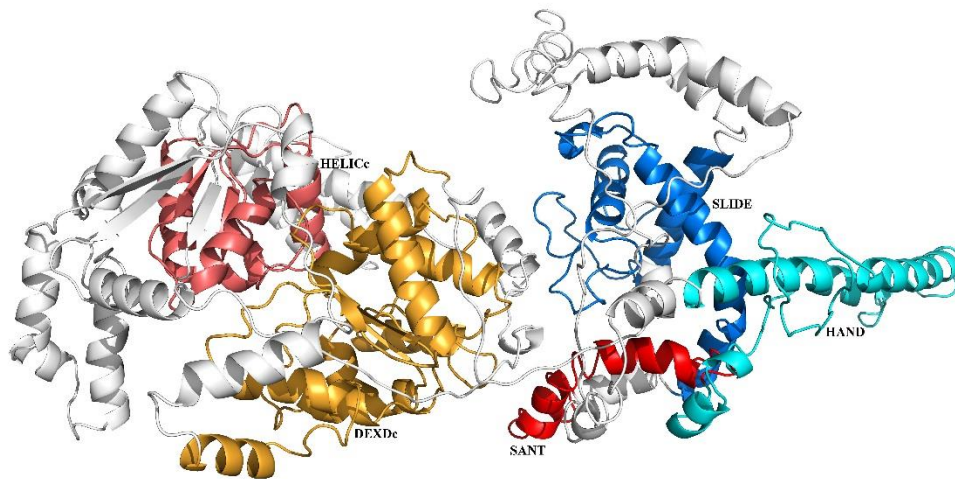

**B**

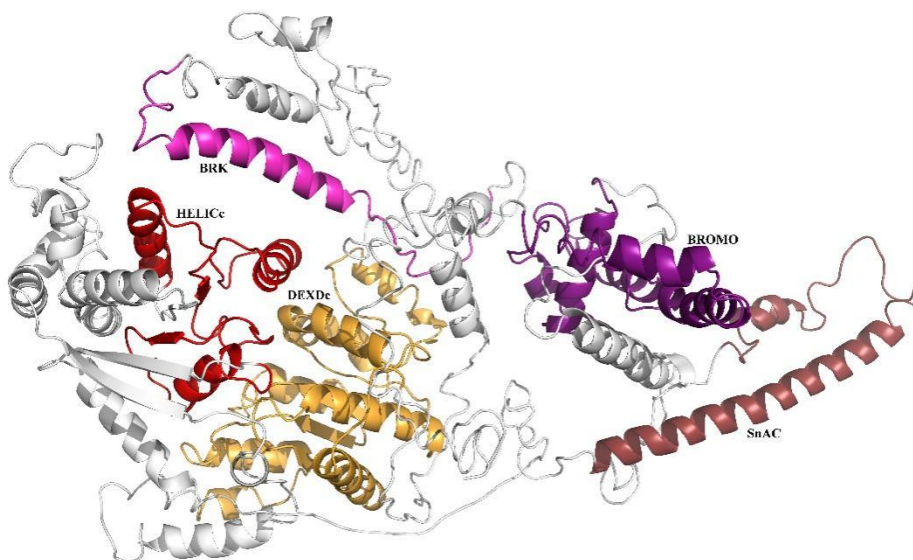

**Figure S3.** Predicted 3D structure of ISWI (A) and BRM (B) proteins in *Tuta absoluta*.

A

|                |                                                                                                                               |      |
|----------------|-------------------------------------------------------------------------------------------------------------------------------|------|
| T.absoluta     | .MSQDEAMDVGVDEENSSDSSSGREGIFESKQDORSRRHLLKQTEIESHFMNTHSGS..SEPRKQGRHGVKELFEQSEDSANHRHRRTEQEEELLAEINAKINPIRFEZSP               | 127  |
| B.mori         | .MACSDAMDVADIGDNGSSDSSSGREGIFESKQDORSRRHLLKQTEIESHFMNTHSGS..SEPRKQGRHGVKELFEQSEDSANHRHRRTEQEEELLAEINAKINPIRFEZSP              | 124  |
| T.ni           | .MSQDEPMVAADVGVENSSDSSSGREGIFESKQDORSRRHLLKQTEIESHFMNTHSGS..SEPRKQGRHGVKELFEQSEDSANHRHRRTEQEEELLAEINAKINPIRFEZSP              | 125  |
| H.armigera     | MSQTEPMVAADVGVENSSDSSSGREGIFESKQDORSRRHLLKQTEIESHFMNTHSGS..SEPRKQGRHGVKELFEQSEDSANHRHRRTEQEEELLAEINAKINPIRFEZSP               | 127  |
| A.mellifera    | .MSQDEANATGUGGVENSSDSSSG..GIFETMDORSRRHLLKQTEIESHFMNTHSGS..SEPRKQGRHGVKELFEQSEDSANHRHRRTEQEEELLAEINAKINPIRFEZSP               | 123  |
| D.melanogaster | MSQTDAVAVATENSGTTCDAHSSGREGIFESKQDORSRRHLLKQTEIESHFMNTHSGS.....TSPGGRHGVKELFEQSEDSANHRHRRTEQEEELLAEINAKINPIRFEZSP             | 120  |
| T.absoluta     | FVFNCGVRYCVRGLNWMISLYE GINGILADEMGLGKTLQTSILGVMRRNVGPHIVIVPKSTLNNNEFRKNCPSIRAVCLIGDQTRTFIRVVMFGWVQVTSYEMIRDSVFKKFW            | 257  |
| B.mori         | FVFNCGVRYCVRGLNWMISLYE GINGILADEMGLGKTLQTSILGVMRRNVGPHIVIVPKSTLNNNEFRKNCPSIRAVCLIGDQTRTFIRVVMFGWVQVTSYEMIRDSVFKKFW            | 254  |
| T.ni           | FVFNCGVRYCVRGLNWMISLYE GINGILADEMGLGKTLQTSILGVMRRNVGPHIVIVPKSTLNNNEFRKNCPSIRAVCLIGDQTRTFIRVVMFGWVQVTSYEMIRDSVFKKFW            | 255  |
| H.armigera     | FVFNCGVRYCVRGLNWMISLYE GINGILADEMGLGKTLQTSILGVMRRNVGPHIVIVPKSTLNNNEFRKNCPSIRAVCLIGDQTRTFIRVVMFGWVQVTSYEMIRDSVFKKFW            | 257  |
| A.mellifera    | FVFNCGVRYCVRGLNWMISLYE GINGILADEMGLGKTLQTSILGVMRRNVGPHIVIVPKSTLNNNEFRKNCPSIRAVCLIGDQTRTFIRVVMFGWVQVTSYEMIRDSVFKKFW            | 253  |
| D.melanogaster | FVFNCGVRYCVRGLNWMISLYE GINGILADEMGLGKTLQTSILGVMRRNVGPHIVIVPKSTLNNNEFRKNCPSIRAVCLIGDQTRTFIRVVMFGWVQVTSYEMIRDSVFKKFW            | 250  |
| T.absoluta     | RYVIDEABRIKNEKSKLSELRFRFNNRLLTGTPLONNLHEMLNLLFLPDVNSSDDFSWNTNARLGNQSRLEBAVLPFLLRLRKEVBRKLEPKKEDRYVGLSKMCRGWYTKVLMKDI          | 387  |
| B.mori         | RYVIDEABRIKNEKSKLSELRFRFNNRLLTGTPLONNLHEMLNLLFLPDVNSSDDFSWNTNARLGNQSRLEBAVLPFLLRLRKEVBRKLEPKKEDRYVGLSKMCRGWYTKVLMKDI          | 384  |
| T.ni           | RYVIDEABRIKNEKSKLSELRFRFNNRLLTGTPLONNLHEMLNLLFLPDVNSSDDFSWNTNARLGNQSRLEBAVLPFLLRLRKEVBRKLEPKKEDRYVGLSKMCRGWYTKVLMKDI          | 385  |
| H.armigera     | RYVIDEABRIKNEKSKLSELRFRFNNRLLTGTPLONNLHEMLNLLFLPDVNSSDDFSWNTNARLGNQSRLEBAVLPFLLRLRKEVBRKLEPKKEDRYVGLSKMCRGWYTKVLMKDI          | 387  |
| A.mellifera    | RYVIDEABRIKNEKSKLSELRFRFNNRLLTGTPLONNLHEMLNLLFLPDVNSSDDFSWNTNARLGNQSRLEBAVLPFLLRLRKEVBRKLEPKKEDRYVGLSKMCRGWYTKVLMKDI          | 383  |
| D.melanogaster | RYVIDEABRIKNEKSKLSELRFRFNNRLLTGTPLONNLHEMLNLLFLPDVNSSDDFSWNTNARLGNQSRLEBAVLPFLLRLRKEVBRKLEPKKEDRYVGLSKMCRGWYTKVLMKDI          | 380  |
| T.absoluta     | LVVNGAGVEKMRQLNIMCLRKCNHPLYFDGAEPGPPYTTIHLVYNGGKMLDKLPLKLCQSRVLFSQCMTRMLDILEYCHWQVYCYRLDGTHEEDRCQIDENAGSSEKFMFLSTRAG          | 517  |
| B.mori         | LVVNGAGVEKMRQLNIMCLRKCNHPLYFDGAEPGPPYTTIHLVYNGGKMLDKLPLKLCQSRVLFSQCMTRMLDILEYCHWQVYCYRLDGTHEEDRCQIDENAGSSEKFMFLSTRAG          | 514  |
| T.ni           | LVVNGAGVEKMRQLNIMCLRKCNHPLYFDGAEPGPPYTTIHLVYNGGKMLDKLPLKLCQSRVLFSQCMTRMLDILEYCHWQVYCYRLDGTHEEDRCQIDENAGSSEKFMFLSTRAG          | 515  |
| H.armigera     | LVVNGAGVEKMRQLNIMCLRKCNHPLYFDGAEPGPPYTTIHLVYNGGKMLDKLPLKLCQSRVLFSQCMTRMLDILEYCHWQVYCYRLDGTHEEDRCQIDENAGSSEKFMFLSTRAG          | 517  |
| A.mellifera    | LVVNGAGVEKMRQLNIMCLRKCNHPLYFDGAEPGPPYTTIHLVYNGGKMLDKLPLKLCQSRVLFSQCMTRMLDILEYCHWQVYCYRLDGTHEEDRCQIDENAGSSEKFMFLSTRAG          | 513  |
| D.melanogaster | LVVNGAGVEKMRQLNIMCLRKCNHPLYFDGAEPGPPYTTIHLVYNGGKMLDKLPLKLCQSRVLFSQCMTRMLDILEYCHWQVYCYRLDGTHEEDRCQIDENAGSSEKFMFLSTRAG          | 510  |
| T.absoluta     | GLGINLADVVIIYDSNNFQMCQAMDRAHRIGCKQCVRVFPIITITVEEKIVERAEVKRLDQVIGGRVLVQSNLNKDEMLNIRGANVVSQDSATTEIDIITLAGEVHTEDRCQI             | 646  |
| B.mori         | GLGINLADVVIIYDSNNFQMCQAMDRAHRIGCKQCVRVFPIITITVEEKIVERAEVKRLDQVIGGRVLVQSNLNKDEMLNIRGANVVSQDSATTEIDIITLAGEVHTEDRCQI             | 643  |
| T.ni           | GLGINLADVVIIYDSNNFQMCQAMDRAHRIGCKQCVRVFPIITITVEEKIVERAEVKRLDQVIGGRVLVQSNLNKDEMLNIRGANVVSQDSATTEIDIITLAGEVHTEDRCQI             | 644  |
| H.armigera     | GLGINLADVVIIYDSNNFQMCQAMDRAHRIGCKQCVRVFPIITITVEEKIVERAEVKRLDQVIGGRVLVQSNLNKDEMLNIRGANVVSQDSATTEIDIITLAGEVHTEDRCQI             | 646  |
| A.mellifera    | GLGINLADVVIIYDSNNFQMCQAMDRAHRIGCKQCVRVFPIITITVEEKIVERAEVKRLDQVIGGRVLVQSNLNKDEMLNIRGANVVSQDSATTEIDIITLAGEVHTEDRCQI             | 643  |
| D.melanogaster | GLGINLADVVIIYDSNNFQMCQAMDRAHRIGCKQCVRVFPIITITVEEKIVERAEVKRLDQVIGGRVLVQSNLNKDEMLNIRGANVVSQDSATTEIDIITLAGEVHTEDRCQI             | 640  |
| T.absoluta     | LSISESSLRPFMSDTGAT..DSVYCFEGEDIREKQKSHLPGSIEFFPKRRKANYAVDAYFREALRVSEPKARVQCAPRPPKQIVQDFQFFPPFLFELLDCETINSGRTGKYKVRNEELGEDAKAQ | 774  |
| B.mori         | LSISESSLRPFMSDTGAT..DSVYCFEGEDIREKQKSHLPGSIEFFPKRRKANYAVDAYFREALRVSEPKARVQCAPRPPKQIVQDFQFFPPFLFELLDCETINSGRTGKYKVRNEELGEDAKAQ | 772  |
| T.ni           | LSISESSLRPFMSDTGAT..DSVYCFEGEDIREKQKSHLPGSIEFFPKRRKANYAVDAYFREALRVSEPKARVQCAPRPPKQIVQDFQFFPPFLFELLDCETINSGRTGKYKVRNEELGEDAKAQ | 773  |
| H.armigera     | LSISESSLRPFMSDTGAT..DSVYCFEGEDIREKQKSHLPGSIEFFPKRRKANYAVDAYFREALRVSEPKARVQCAPRPPKQIVQDFQFFPPFLFELLDCETINSGRTGKYKVRNEELGEDAKAQ | 775  |
| A.mellifera    | LSISESSLRPFMSDTGAT..DSVYCFEGEDIREKQKSHLPGSIEFFPKRRKANYAVDAYFREALRVSEPKARVQCAPRPPKQIVQDFQFFPPFLFELLDCETINSGRTGKYKVRNEELGEDAKAQ | 767  |
| D.melanogaster | LSISESSLRPFMSDTGAT..DSVYCFEGEDIREKQKSHLPGSIEFFPKRRKANYAVDAYFREALRVSEPKARVQCAPRPPKQIVQDFQFFPPFLFELLDCETINSGRTGKYKVRNEELGEDAKAQ | 768  |
| T.absoluta     | FEQRKILAEPLTEPVEKEKLLQGFTWTKRDFNQFIKANERYGRDDINIAKVEGKTPEEVYSAVWERCQELQIDIRMGQIERGEKICRRACIKKALDPMARYRAPPHOLRISYGNK           | 904  |
| B.mori         | FEQRKILAEPLTEPVEKEKLLQGFTWTKRDFNQFIKANERYGRDDINIAKVEGKTPEEVYSAVWERCQELQIDIRMGQIERGEKICRRACIKKALDPMARYRAPPHOLRISYGNK           | 902  |
| T.ni           | FEQRKILAEPLTEPVEKEKLLQGFTWTKRDFNQFIKANERYGRDDINIAKVEGKTPEEVYSAVWERCQELQIDIRMGQIERGEKICRRACIKKALDPMARYRAPPHOLRISYGNK           | 903  |
| H.armigera     | FEQRKILAEPLTEPVEKEKLLQGFTWTKRDFNQFIKANERYGRDDINIAKVEGKTPEEVYSAVWERCQELQIDIRMGQIERGEKICRRACIKKALDPMARYRAPPHOLRISYGNK           | 905  |
| A.mellifera    | FEQRKILAEPLTEPVEKEKLLQGFTWTKRDFNQFIKANERYGRDDINIAKVEGKTPEEVYSAVWERCQELQIDIRMGQIERGEKICRRACIKKALDPMARYRAPPHOLRISYGNK           | 897  |
| D.melanogaster | FEQRKILAEPLTEPVEKEKLLQGFTWTKRDFNQFIKANERYGRDDINIAKVEGKTPEEVYSAVWERCQELQIDIRMGQIERGEKICRRACIKKALDPMARYRAPPHOLRISYGNK           | 898  |
| T.absoluta     | GRNNVDEDRFLVCMHLGFDKENVYEELRAVHAPCFRFDWHKSRTAELQRCRNTLITLIERENLELEPERGKRRKESANQNTIPGAASKGAGAGRRADAAQDSACKQKRRK.....           | 1025 |
| B.mori         | GRNNVDEDRFLVCMHLGFDKENVYEELRAVHAPCFRFDWHKSRTAELQRCRNTLITLIERENLELEPERGKRRKESANQNTIPGAASKGAGAGRRADAAQDSACKQKRRK.....           | 1026 |
| T.ni           | GRNNVDEDRFLVCMHLGFDKENVYEELRAVHAPCFRFDWHKSRTAELQRCRNTLITLIERENLELEPERGKRRKESANQNTIPGAASKGAGAGRRADAAQDSACKQKRRK.....           | 1027 |
| H.armigera     | GRNNVDEDRFLVCMHLGFDKENVYEELRAVHAPCFRFDWHKSRTAELQRCRNTLITLIERENLELEPERGKRRKESANQNTIPGAASKGAGAGRRADAAQDSACKQKRRK.....           | 1028 |
| A.mellifera    | GRNNVDEDRFLVCMHLGFDKENVYEELRAVHAPCFRFDWHKSRTAELQRCRNTLITLIERENLELEPERGKRRKESANQNTIPGAASKGAGAGRRADAAQDSACKQKRRK.....           | 1009 |
| D.melanogaster | GRNNVDEDRFLVCMHLGFDKENVYEELRAVHAPCFRFDWHKSRTAELQRCRNTLITLIERENLELEPERGKRRKESANQNTIPGAASKGAGAGRRADAAQDSACKQKRRK.....           | 1026 |



**Figure S4.** (A) Multiple alignments of the ISWI protein sequences from *Tuta absoluta* and other insects. The results revealed that the deduced protein sequence of *TaISWI* was highly conserved when compared to previously identified ISWI protein sequences. *T. absoluta*: *Tuta absoluta*; *B. mori*: *Bombyx mori* (XP\_012547334.1); *T. ni*: *Trichoplusia ni* (XP\_026747092.1); *H. armigera*: *Helicoverpa armigera* (XP\_021184575.1); *A. mellifera*: *Apis mellifera* (XP\_006565266.1); *D. melanogaster*: *Drosophila melanogaster* (NP\_523719.1). (B) Multiple alignments of the BRM protein sequences from *Tuta absoluta* and other insects. *B. mori* (XP\_037871728.1); *T. ni* (XP\_026725796.1); *P. rapae*: *Pieris rapae* (XP\_022130779.1); *D. melanogaster* (NP\_536745.4).

A

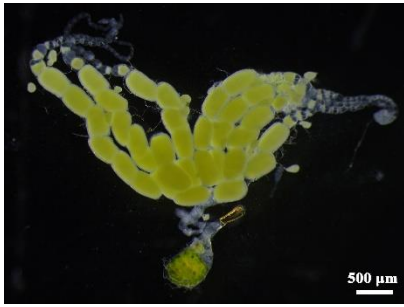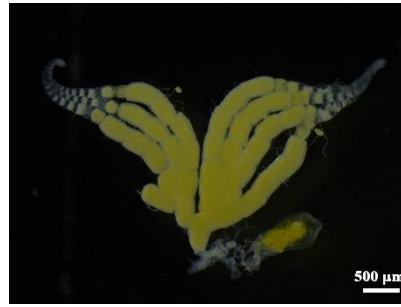

B

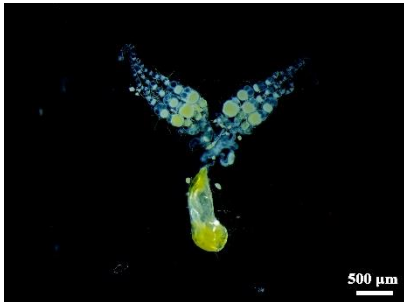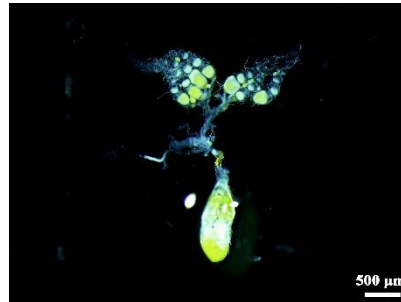

C

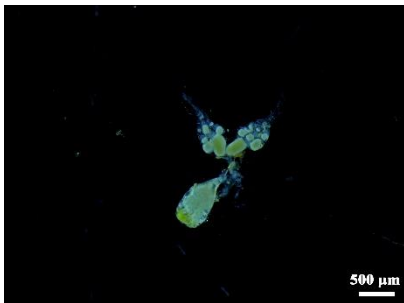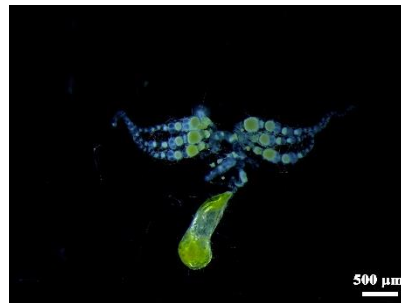

**Figure S5.** More pictures of the effects of dsISWI and dsBRM on *Tuta absoluta* ovary development. (A) Ovaries of uninjected 4-d females. (B) Abnormal ovaries of 4-d females injected with dsISWI. (C) Abnormal ovaries of 4-d females injected with dsBRM.

**Table S1.** Details of protein sequences used for phylogenetic analysis.

| ISWI                                |                          |                              |                          |
|-------------------------------------|--------------------------|------------------------------|--------------------------|
| Insect species                      | GenBank accession number | Insect species               | GenBank accession number |
| <i>Polistes canadensis</i>          | XP_014609868.1           | <i>Ooceraea biroi</i>        | XP_011352072.1           |
| <i>Ceratina calcarata</i>           | XP_017890682.1           | <i>Camponotus floridanus</i> | XP_011254438.1           |
| <i>Linepithema humile</i>           | XP_012220642.1           | <i>Bombus impatiens</i>      | XP_024221024.1           |
| <i>Apis mellifera</i>               | XP_006565266.1           | <i>Apis florea</i>           | XP_012344097.1           |
| <i>Rhopalosiphum maidis</i>         | XP_026823151.1           | <i>Myzus persicae</i>        | XP_022171705.1           |
| <i>Aphis gossypii</i>               | XP_027848482.1           | <i>Acyrtosiphon pisum</i>    | XP_001945595.1           |
| <i>Sipha flava</i>                  | XP_025406176.1           | <i>Diuraphis noxia</i>       | XP_015375778.1           |
| <i>Trichoplusia ni</i>              | XP_026747092.1           | <i>Helicoverpa armigera</i>  | XP_021184575.1           |
| <i>Spodoptera litura</i>            | XP_022829094.1           | <i>Agrilus planipennis</i>   | XP_025836927.1           |
| <i>Nicrophorus vespilloides</i>     | XP_017778534.1           | <i>Bombyx mandarina</i>      | XP_028037570.1           |
| <i>Onthophagus taurus</i>           | XP_022908972.1           | <i>Aethina tumida</i>        | XP_019866350.1           |
| <i>Papilio machaon</i>              | XP_014355986.1           | <i>Papilio xuthus</i>        | XP_013175309.1           |
| <i>Papilio polytes</i>              | XP_013135016.1           | <i>Galleria mellonella</i>   | XP_026765070.1           |
| <i>Bombyx mori</i>                  | XP_012547334.1           | <i>Bicyclus anynana</i>      | XP_023952043.1           |
| <i>Leptinotarsa decemlineata</i>    | XP_023014233.1           | <i>Diabrotica virgifera</i>  | XP_028129819.1           |
| <i>Plutella xylostella</i>          | XP_011555157.1           | <i>Ostrinia furnacalis</i>   | XP_028158215.1           |
| <i>Dendroctonus ponderosae</i>      | XP_019754255.1           | <i>Bactrocera dorsalis</i>   | XP_011197903.1           |
| <i>Drosophila melanogaster</i>      | NP_523719.1              | <i>Ceratitis capitata</i>    | XP_004517436.1           |
| <i>Anoplophora glabripennis</i>     | XP_018572974.1           | <i>Bactrocera latifrons</i>  | XP_018803107.1           |
| BRM                                 |                          |                              |                          |
| Insect species                      | GenBank accession number | Insect species               | GenBank accession number |
| <i>Bombyx mori</i>                  | XP_037871728.1           | <i>Pararge aegeria</i>       | XP_039765300.1           |
| <i>Leptinotarsa decemlineata</i>    | XP_023029618.1           | <i>Bombyx mandarina</i>      | XP_028033541.1           |
| <i>Hyposmocoma kahamanoa</i>        | XP_026323568.1           | <i>Pieris rapae</i>          | XP_022130779.1           |
| <i>Maniola hyperantus</i>           | XP_034841481.1           | <i>Ostrinia furnacalis</i>   | XP_028176736.1           |
| <i>Spodoptera litura</i>            | XP_022824228.1           | <i>Trichoplusia ni</i>       | XP_026725796.1           |
| <i>Manduca sexta</i>                | XP_037300295.1           | <i>Drosophila busckii</i>    | ALC44792.1               |
| <i>Drosophila melanogaster</i>      | NP_536745.4              | <i>Bactrocera tryoni</i>     | XP_039964134.1           |
| <i>Cyphomyrmex costatus</i>         | XP_018396747.1           | <i>Sipha flava</i>           | XP_025423084.1           |
| <i>Vollenhovia emeryi</i>           | XP_011868917.1           | <i>Myzus persicae</i>        | XP_022166801.1           |
| <i>Trachymyrmex septentrionalis</i> | XP_018355410.1           | <i>Bombus terrestris</i>     | XP_012166376.1           |



| <b>Insect species</b>           | <b>GenBank accession number</b> | <b>Insect species</b>      | <b>GenBank accession number</b> |
|---------------------------------|---------------------------------|----------------------------|---------------------------------|
| <i>Camponotus floridanus</i>    | XP_011257142.2                  | <i>Nylanderia fulva</i>    | XP_029162796.1                  |
| <i>Apis mellifera</i>           | XP_026300357.1                  | <i>Apis florea</i>         | XP_012343937.1                  |
| <i>Melanaphis sacchari</i>      | XP_025204346.1                  | <i>Apis dorsata</i>        | XP_006622867.1                  |
| <i>Rhopalosiphum maidis</i>     | XP_026814829.1                  | <i>Photinus pyralis</i>    | XP_031335174.1                  |
| <i>Acyrtosiphon pisum</i>       | XP_001947872.2                  | <i>Polistes dominula</i>   | XP_015191338.1                  |
| <i>Sitophilus oryzae</i>        | XP_030758143.1                  | <i>Tribolium castaneum</i> | EEZ97706.2                      |
| <i>Anoplophora glabripennis</i> | XP_018562326.2                  | <i>Agrilus planipennis</i> | XP_025830418.1                  |
